# Supplementary material for: Zika Virus Envelope Protein Domain III Produced in K. phaffii Has the Potential for Diagnostic Applications
Source: MDPI journal article supplement (doi:10.3390/diagnostics12051198), 2022-05-11
Supplement: s1 [file s1]

## SUPPLEMENTARY MATERIAL

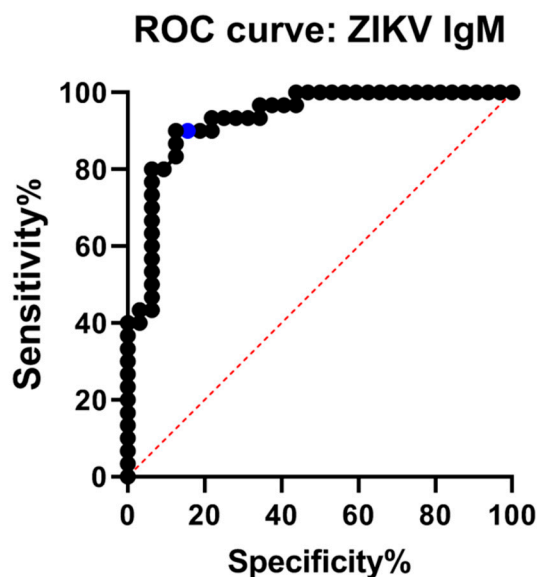

**Supplementary Figure S1.** ROC curve for anti-ZIKV IgM. The area under the curve was 0.9307 (95% confidence interval: 0.8685-0.9929) (P value: < 0.0001). The best cut-off was 0.3593, with 90 % sensitivity and 87.5 % specificity (blue dot).

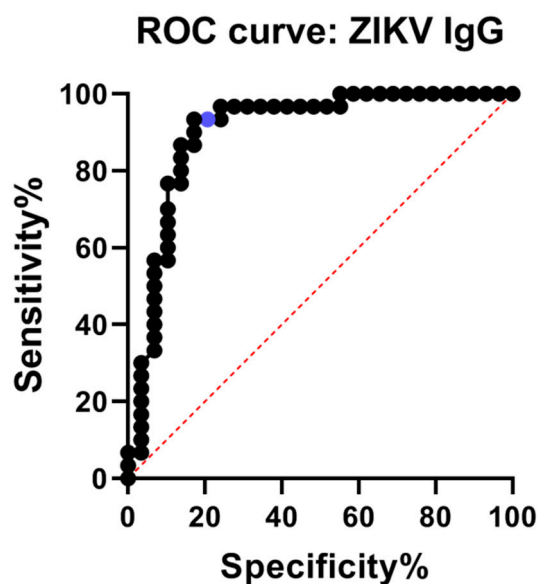

**Supplementary Figure S2.** ROC curve for anti-ZIKV IgG. The area under the curve was 0.9017 (95% confidence interval: 0.8150-0.9885) (P value: < 0.0001). The best cut-off was 0.5234, with 93.33 % sensitivity and 82.76 % specificity (blue dot).

**Supplementary Table S1.** Sensitivity and specificity for anti-ZIKV IgM. The best cut-off is in line 31 and has been highlighted in bold.

| Line      | Cut-off            | Sensitivity% | Specificity% | Youden      |
|-----------|--------------------|--------------|--------------|-------------|
| 1         | > 0.1672           | 100          | 3.125        | 3.125       |
| 2         | > 0.1801           | 100          | 6.25         | 6.25        |
| 3         | > 0.1836           | 100          | 9.375        | 9.375       |
| 4         | > 0.1888           | 100          | 12.5         | 12.5        |
| 5         | > 0.1963           | 100          | 15.63        | 15.63       |
| 6         | > 0.2000           | 100          | 18.75        | 18.75       |
| 7         | > 0.2040           | 100          | 21.88        | 21.88       |
| 8         | > 0.2130           | 100          | 25           | 25          |
| 9         | > 0.2202           | 100          | 28.13        | 28.13       |
| 10        | > 0.2302           | 100          | 31.25        | 31.25       |
| 11        | > 0.2400           | 100          | 34.38        | 34.38       |
| 12        | > 0.2473           | 100          | 37.5         | 37.5        |
| 13        | > 0.2621           | 100          | 40.63        | 40.63       |
| 14        | > 0.2782           | 100          | 43.75        | 43.75       |
| 15        | > 0.2865           | 100          | 46.88        | 46.88       |
| 16        | > 0.2901           | 100          | 50           | 50          |
| 17        | > 0.2941           | 100          | 53.13        | 53.13       |
| 18        | > 0.2976           | 100          | 56.25        | 56.25       |
| 19        | > 0.3034           | 96.67        | 56.25        | 52.92       |
| 20        | > 0.3093           | 96.67        | 59.38        | 56.05       |
| 21        | > 0.3121           | 96.67        | 62.5         | 59.17       |
| 22        | > 0.3158           | 96.67        | 65.63        | 62.3        |
| 23        | > 0.3197           | 93.33        | 65.63        | 58.96       |
| 24        | > 0.3259           | 93.33        | 68.75        | 62.08       |
| 25        | > 0.3343           | 93.33        | 71.88        | 65.21       |
| 26        | > 0.3414           | 93.33        | 75           | 68.33       |
| 27        | > 0.3471           | 93.33        | 78.13        | 71.46       |
| 28        | > 0.3496           | 90           | 78.13        | 68.13       |
| 29        | > 0.3508           | 90           | 81.25        | 71.25       |
| 30        | > 0.3540           | 90           | 84.38        | 74.38       |
| <b>31</b> | <b>&gt; 0.3593</b> | <b>90</b>    | <b>87.5</b>  | <b>77.5</b> |
| 32        | > 0.3665           | 86.67        | 87.5         | 74.17       |
| 33        | > 0.3728           | 83.33        | 87.5         | 70.83       |
| 34        | > 0.3782           | 80           | 90.63        | 70.63       |
| 35        | > 0.3895           | 80           | 93.75        | 73.75       |
| 36        | > 0.3987           | 76.67        | 93.75        | 70.42       |
| 37        | > 0.4018           | 73.33        | 93.75        | 67.08       |
| 38        | > 0.4064           | 70           | 93.75        | 63.75       |
| 39        | > 0.4130           | 66.67        | 93.75        | 60.42       |

|    |          |       |       |       |
|----|----------|-------|-------|-------|
| 40 | > 0.4181 | 63.33 | 93.75 | 57.08 |
| 41 | > 0.4220 | 60    | 93.75 | 53.75 |
| 42 | > 0.4297 | 56.67 | 93.75 | 50.42 |
| 43 | > 0.4419 | 53.33 | 93.75 | 47.08 |
| 44 | > 0.4591 | 50    | 93.75 | 43.75 |
| 45 | > 0.4725 | 46.67 | 93.75 | 40.42 |
| 46 | > 0.4779 | 43.33 | 93.75 | 37.08 |
| 47 | > 0.4834 | 43.33 | 96.88 | 40.21 |
| 48 | > 0.4897 | 40    | 96.88 | 36.88 |
| 49 | > 0.5091 | 40    | 100   | 40    |
| 50 | > 0.5339 | 36.67 | 100   | 36.67 |
| 51 | > 0.5466 | 33.33 | 100   | 33.33 |
| 52 | > 0.5804 | 30    | 100   | 30    |
| 53 | > 0.6171 | 26.67 | 100   | 26.67 |
| 54 | > 0.6322 | 23.33 | 100   | 23.33 |
| 55 | > 0.6461 | 20    | 100   | 20    |
| 56 | > 0.6555 | 16.67 | 100   | 16.67 |
| 57 | > 0.6808 | 13.33 | 100   | 13.33 |
| 58 | > 0.7069 | 10    | 100   | 10    |
| 59 | > 0.7177 | 6.667 | 100   | 6.667 |
| 60 | > 0.7248 | 3.333 | 100   | 3.333 |

**Supplementary Table S2.** of sensitivity and specificity for anti-ZIKV IgG. The best cut-off is in line 26 and has been highlighted in bold.

| Line      | Cut-off            | Sensitivity% | Specificity% | Youden       |
|-----------|--------------------|--------------|--------------|--------------|
| 1         | > 0.3468           | 100          | 3.448        | 3.448        |
| 2         | > 0.3725           | 100          | 6.897        | 6.897        |
| 3         | > 0.3895           | 100          | 10.34        | 10.34        |
| 4         | > 0.3937           | 100          | 13.79        | 13.79        |
| 5         | > 0.4013           | 100          | 17.24        | 17.24        |
| 6         | > 0.4126           | 100          | 20.69        | 20.69        |
| 7         | > 0.4221           | 100          | 24.14        | 24.14        |
| 8         | > 0.4321           | 100          | 27.59        | 27.59        |
| 9         | > 0.4382           | 100          | 31.03        | 31.03        |
| 10        | > 0.4398           | 100          | 34.48        | 34.48        |
| 11        | > 0.4430           | 100          | 37.93        | 37.93        |
| 12        | > 0.4477           | 100          | 41.38        | 41.38        |
| 13        | > 0.4512           | 100          | 44.83        | 44.83        |
| 14        | > 0.4539           | 96.67        | 44.83        | 41.5         |
| 15        | > 0.4628           | 96.67        | 48.28        | 44.95        |
| 16        | > 0.4734           | 96.67        | 51.72        | 48.39        |
| 17        | > 0.4787           | 96.67        | 55.17        | 51.84        |
| 18        | > 0.4836           | 96.67        | 58.62        | 55.29        |
| 19        | > 0.4869           | 96.67        | 62.07        | 58.74        |
| 20        | > 0.4898           | 96.67        | 65.52        | 62.19        |
| 21        | > 0.4928           | 96.67        | 68.97        | 65.64        |
| 22        | > 0.4954           | 96.67        | 72.41        | 69.08        |
| 23        | > 0.5030           | 96.67        | 75.86        | 72.53        |
| 24        | > 0.5092           | 93.33        | 75.86        | 69.19        |
| 25        | > 0.5158           | 93.33        | 79.31        | 72.64        |
| <b>26</b> | <b>&gt; 0.5234</b> | <b>93.33</b> | <b>82.76</b> | <b>76.09</b> |
| 27        | > 0.5298           | 90           | 82.76        | 72.76        |
| 28        | > 0.5360           | 86.67        | 82.76        | 69.43        |
| 29        | > 0.5388           | 86.67        | 86.21        | 72.88        |
| 30        | > 0.5415           | 83.33        | 86.21        | 69.54        |
| 31        | > 0.5473           | 80           | 86.21        | 66.21        |
| 32        | > 0.5583           | 76.67        | 86.21        | 62.88        |
| 33        | > 0.5668           | 76.67        | 89.66        | 66.33        |
| 34        | > 0.5749           | 70           | 89.66        | 59.66        |
| 35        | > 0.5893           | 66.67        | 89.66        | 56.33        |
| 36        | > 0.5972           | 63.33        | 89.66        | 52.99        |
| 37        | > 0.6008           | 60           | 89.66        | 49.66        |

|    |          |       |       |       |
|----|----------|-------|-------|-------|
| 38 | > 0.6047 | 56.67 | 89.66 | 46.33 |
| 39 | > 0.6064 | 56.67 | 93.1  | 49.77 |
| 40 | > 0.6084 | 53.33 | 93.1  | 46.43 |
| 41 | > 0.6150 | 50    | 93.1  | 43.1  |
| 42 | > 0.6229 | 46.67 | 93.1  | 39.77 |
| 43 | > 0.6266 | 43.33 | 93.1  | 36.43 |
| 44 | > 0.6303 | 40    | 93.1  | 33.1  |
| 45 | > 0.6393 | 36.67 | 93.1  | 29.77 |
| 46 | > 0.6495 | 33.33 | 93.1  | 26.43 |
| 47 | > 0.6573 | 30    | 96.55 | 26.55 |
| 48 | > 0.6623 | 26.67 | 96.55 | 23.22 |
| 49 | > 0.6636 | 23.33 | 96.55 | 19.88 |
| 50 | > 0.6718 | 20    | 96.55 | 16.55 |
| 51 | > 0.6873 | 16.67 | 96.55 | 13.22 |
| 52 | > 0.6960 | 13.33 | 96.55 | 9.88  |
| 53 | > 0.6989 | 10    | 96.55 | 6.55  |
| 54 | > 0.7052 | 6.667 | 96.55 | 3.217 |
| 55 | > 0.7102 | 6.667 | 100   | 6.667 |
| 56 | > 0.7330 | 3.333 | 100   | 3.333 |

**Supplementary Table S3.** Comparison of ROC curve cut-off, sensitivity, and specificity with traditional 3xSD. The negative serum cut-off was obtained by averaging the optical densities of the ZIKV negative serum samples plus a three-fold standard deviation (Mean + 3xSD). The results were presented in the table below:

| ELISA                   | Mean + 3xSD | Curve ROC |
|-------------------------|-------------|-----------|
| Anti-IgM (cut-off)      | 0.33        | 0.3593    |
| Anti-IgM (sensitivity)  | 93.33 %     | 90.00 %   |
| Anti-IgM (specificity)) | 68.75       | 87.5 %    |
| Anti-IgG (cut-off)      | 0.52        | 0.5234    |
| Anti-IgG (sensitivity)  | 93.33 %     | 93.33 %   |
| Anti-IgG (specificity)  | 79.3 %      | 82.76 %   |

**Supplementary Table S4.** The optical density of the IgM ELISA was performed with ZIKV negative and positive human sera samples. The false positives are 17, 21, 18, and 13. The false negatives are: 7, 8 e 5. false-positive and false-negative samples are in bold.

| Human serum | ZIKV- (OD)    | Human serum | ZIKV + (OD)   |
|-------------|---------------|-------------|---------------|
| 1           | 0.2069        | 1           | 0.4164        |
| 2           | 0.1937        | 2           | 0.4096        |
| 3           | 0.307         | 3           | 0.7242        |
| 4           | 0.241         | 4           | 0.5255        |
| 5           | 0.3456        | <b>5</b>    | <b>0.3485</b> |
| 6           | 0.2872        | 6           | 0.3742        |
| 7           | 0.2706        | <b>7</b>    | <b>0.2998</b> |
| 8           | 0.3203        | <b>8</b>    | <b>0.319</b>  |
| 9           | 0.1767        | 9           | 0.3968        |
| 10          | 0.1834        | 10          | 0.3713        |
| 11          | 0.1989        | 11          | 0.551         |
| 12          | 0.3569        | 12          | 0.3616        |
| <b>13</b>   | <b>0.3822</b> | 13          | 0.4005        |
| 14          | 0.2011        | 14          | 0.435         |
| 15          | 0.3371        | 15          | 0.4243        |
| 16          | 0.3126        | 16          | 0.4755        |
| <b>17</b>   | <b>0.4802</b> | 17          | 0.6589        |
| <b>18</b>   | <b>0.3742</b> | 18          | 0.4031        |
| 19          | 0.2536        | 19          | 0.4488        |
| 20          | 0.2389        | 20          | 0.4197        |
| <b>21</b>   | <b>0.4927</b> | 21          | 0.7254        |
| 22          | 0.3115        | 22          | 0.7111        |
| 23          | 0.3315        | 23          | 0.6401        |
| 24          | 0.351         | 24          | 0.6098        |
| 25          | 0.3506        | 25          | 0.7026        |
| 26          | 0.2858        | 26          | 0.6243        |
| 27          | 0.2929        | 27          | 0.4866        |
| 28          | 0,2214        | 28          | 0.6521        |
| 29          | 0.2953        | 29          | 0.5422        |
| 30          | 0.219         | 30          | 0.4694        |
| 31          | 0.1838        | 31          |               |
| 32          | 0.1577        | 32          |               |
|             |               |             |               |

**Supplementary Table S5.** The optical density of the IgG ELISA was performed with ZIKV negative and positive human serum samples. False positives are: 15, 10, 25,16 and 1. False negatives are 10 and 27. false-positive and negative samples are highlighted in bold.

| Human serum | ZIKV- (OD)    | Human serum | ZIKV + (OD)   |
|-------------|---------------|-------------|---------------|
| 1           | <b>0.5379</b> | 1           | 0.7548        |
| 2           | 0.3952        | 2           | 0.6618        |
| 3           | 0.4451        | 3           | 0.6042        |
| 4           | 0.3868        | 4           | 0.6077        |
| 5           | 0.3355        | 5           | 0.6791        |
| 6           | 0.4178        | 6           | 0.6627        |
| 7           | 0.3581        | 7           | 0.6965        |
| 8           | 0.3922        | 8           | 0.6209        |
| 9           | 0.487         | 9           | 0.7012        |
| <b>10</b>   | <b>0.6527</b> | <b>10</b>   | <b>0.4521</b> |
| 11          | 0.5213        | 11          | 0.5683        |
| 12          | 0.4804        | 12          | 0.5973        |
| 13          | 0.4502        | 13          | 0.5433        |
| 14          | 0.4978        | 14          | 0.5683        |
| <b>15</b>   | <b>0.7091</b> | 15          | 0.7112        |
| <b>16</b>   | <b>0.5653</b> | 16          | 0.597         |
| 17          | 0.4557        | 17          | 0.5815        |
| 18          | 0.4868        | 18          | 0.6527        |
| 19          | 0.4386        | 19          | 0.6462        |
| 20          | 0.4074        | 20          | 0.6324        |
| 21          | 0.5102        | 21          | 0.6282        |
| 22          | 0.4769        | 22          | 0.6249        |
| 23          | 0.4409        | 23          | 0.5255        |
| 24          | 0.4378        | 24          | 0.534         |
| <b>25</b>   | <b>0.6051</b> | 25          | 0.609         |
| 26          | 0.4698        | 26          | 0.6644        |
| 27          | 0.493         | <b>27</b>   | <b>0.5081</b> |
| 28          | 0.4264        | 28          | 0.6955        |
| 29          | 0.4925        | 29          | 0.5396        |
| 30          |               | 30          | 0.5513        |
